# Supplementary material for: Mesoporous (ZnO)x(MgO)1−x nanoplates: template-free solvothermal synthesis, optical properties, and their applications in water treatment
Source: Royal Society of Chemistry journal article supplement (doi:10.1039/c3nr03019a), 2013-01-01

Mesoporous  $(\text{ZnO})_x(\text{MgO})_{1-x}$  nanoplates: template-free solvothermal  
synthesis, optical properties, and their applications in water treatment

Electronic Supplementary Information

Jiabiao Lian, Caihong Zhang, Qian Li and Dickon H. L. Ng\*

Department of Physics, The Chinese University of Hong Kong, Hong Kong, P. R. China

Corresponding Author: Prof. Dickon H. L. Ng

E-mail: [dng@phy.cuhk.edu.hk](mailto:dng@phy.cuhk.edu.hk)

**Fig. S1** The corresponding XRD patterns of S-1 (a) and S-2 (b) before being annealed.

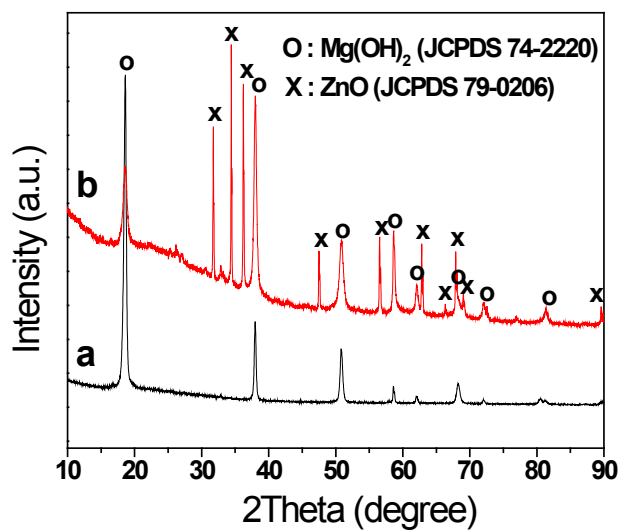

**Fig. S2** TGA curve of the as-prepared precursor ZnO/Mg(OH)<sub>2</sub> nanoplates (S-2 before being annealed).

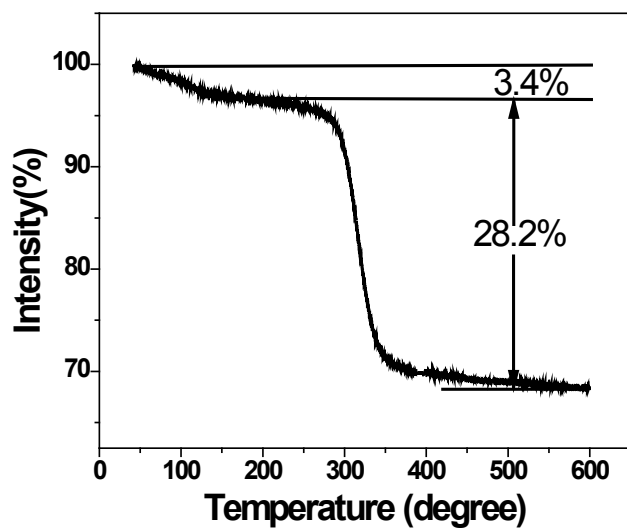

**Fig. S3** (a) Nitrogen adsorption–desorption isotherm and (b) the pore size distribution curve of the mesoporous nanoplates.

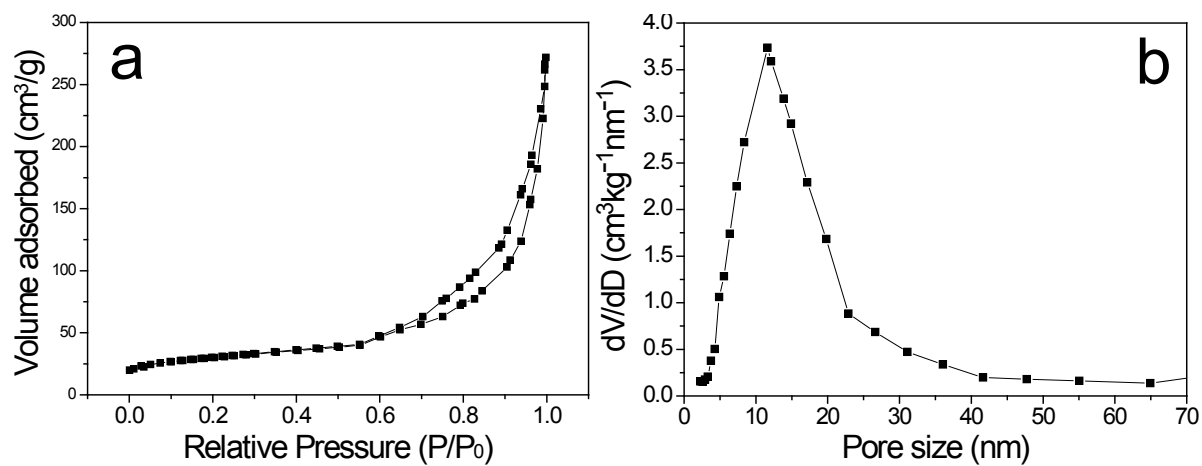

**Fig. S4** The elemental chemical maps of Mg, O, and Zn for the sample S-2 (a) and S-3 (b), respectively. All scale bars are 400 nm.

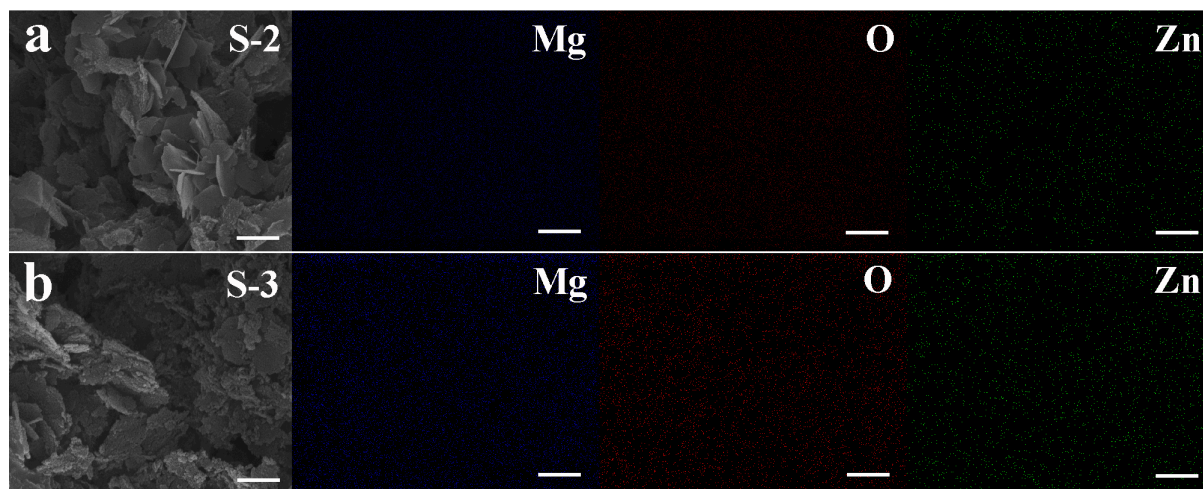

**Fig. S5** UV-vis absorption spectra of MO solutions after being treated with the samples S-1 (a), S-2 (b), S-3 (c), and S-4 (d) at different time intervals, respectively.

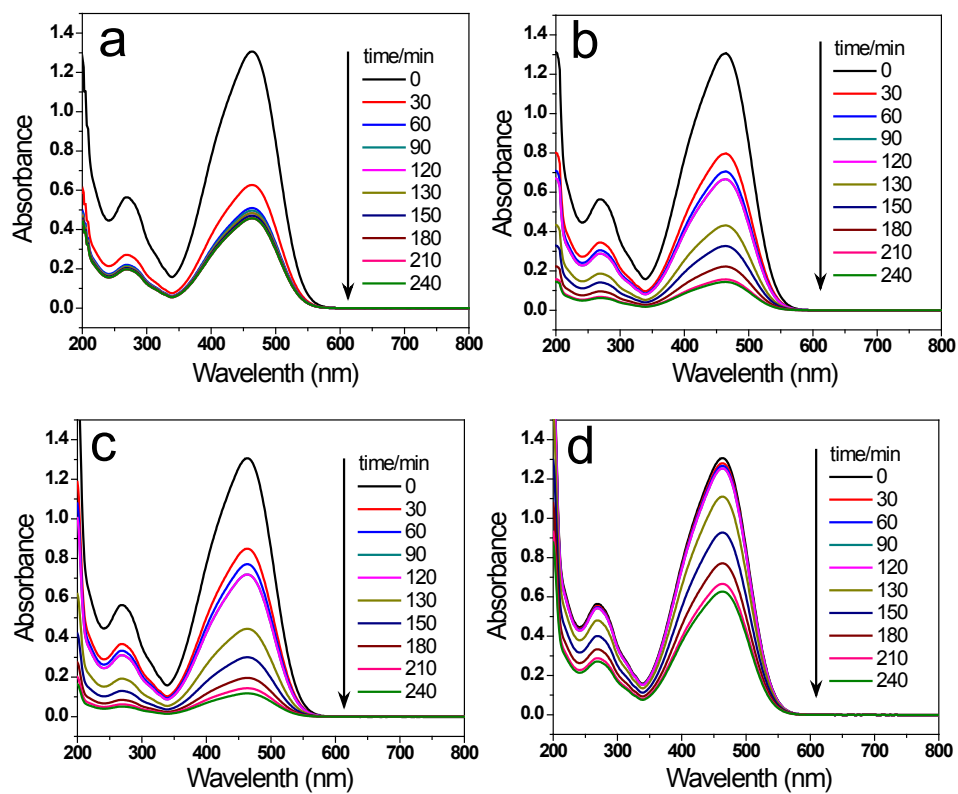

Supplement: c3nr03019a.pdf [file c3nr03019a.pdf]
